# Supplementary material for: Structural Requirements for Recognition of Major Histocompatibility Complex Class II by Membrane-associated RING-CH (MARCH) Protein E3 Ligases
Source: PubMed Central journal article supplement — J Biol Chem. 2012 Jul 3;287(34):28779–89. doi: 10.1074/jbc.M112.381541 (PMC3436574; doi:10.1074/jbc.m112.381541), 2012-07-03
Supplement: supp_M112.381541_jbc.M112.381541-1.pdf [file supp_M112.381541_jbc.M112.381541-1.pdf]

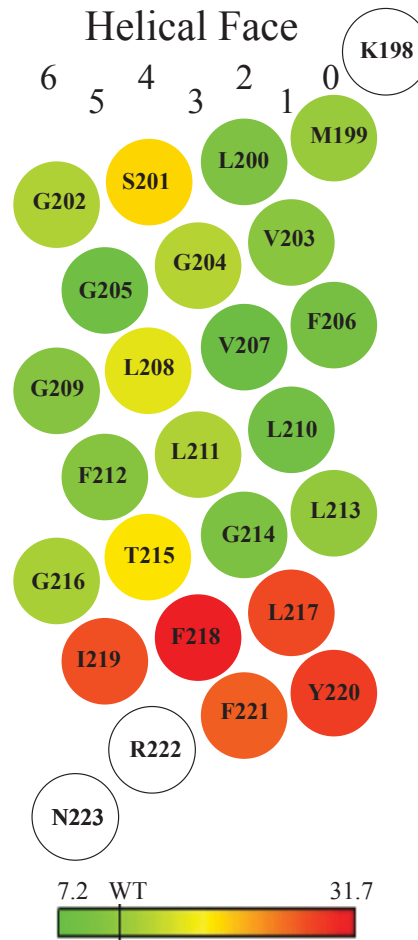

Supplemental Figure 1.

Summary of the importance of individual amino acids for MARCH8-induced down-regulation of CD8-DR $\beta$ . The average contribution of each amino acid was calculated from the arithmetic mean of the expression of constructs in which the particular amino acid was substituted for alanine. The numerical values were converted into a scale ranging from green (not important for MARCH8 recognition) to red (important for MARCH8 recognition) using Matrix2png software. The heatmap was then mapped onto a projection of the DR $\beta$  TM domain. Residues in white were not included in these calculations.
