# Supplementary material for: Structural Requirements for Recognition of Major Histocompatibility Complex Class II by Membrane-associated RING-CH (MARCH) Protein E3 Ligases
Source: PubMed Central journal article supplement — J Biol Chem. 2012 Jul 3;287(34):28779–89. doi: 10.1074/jbc.M112.381541 (PMC3436574; doi:10.1074/jbc.m112.381541), 2012-07-03
Supplement: supp_M112.381541_jbc.M112.381541-2.pdf [file supp_M112.381541_jbc.M112.381541-2.pdf]

Supplemental Table 1

| <b>Construct</b>              | <b>Plasmid backbone</b> | <b>Restriction sites</b>      | <b>PCR template</b>           | <b>PCR Cloning strategy</b><br>Primer pairs (F/R) and pairs of primers for chimeric constructs (N-terminal and C-terminal coding region) were given                              |
|-------------------------------|-------------------------|-------------------------------|-------------------------------|----------------------------------------------------------------------------------------------------------------------------------------------------------------------------------|
| HLA-DR $\alpha$               | pcDNA3.1 Zeo+           | <i>HindIII</i> - <i>BamHI</i> | cDNA                          | Lapaque <i>et al.</i> (2009)                                                                                                                                                     |
| HLA-DR $\beta$                | pcDNA3.1 Zeo+           | <i>EcoRI</i> - <i>NotI</i>    | cDNA                          | Lapaque <i>et al.</i> (2009)                                                                                                                                                     |
| CD8-DR $\alpha$               | pcDNA3.1 Neo-           | <i>EcoRI</i> - <i>BamHI</i>   | HLA-DR $\alpha$               | Lapaque <i>et al.</i> (2009), designated CD8-DRA-extra in that study                                                                                                             |
| CD8-DR $\beta$                | pcDNA3.1 Zeo+           | <i>EcoRI</i> - <i>NotI</i>    | HLA-DR $\beta$                | Lapaque <i>et al.</i> (2009)                                                                                                                                                     |
| CD8-DR $\beta$ -K225R         | pcDNA3.1 Zeo+           | <i>EcoRI</i> - <i>NotI</i>    | CD8-DR $\beta$                | Lapaque <i>et al.</i> (2009)                                                                                                                                                     |
| CD8-DR $\beta$ -K225C         | pcDNA3.1 Neo-           | <i>EcoRI</i> - <i>BamHI</i>   | CD8-DR $\beta$ - $\Delta$ 229 | F: CTTCAGGAATCAGTGTGGACACTCTGGATGAGGATCCGAG,<br>R: CAGAGTGTCCACACTGATTCCTGAAGTAGATGAACAG                                                                                         |
| CD8-DR $\beta$ - $\Delta$ 233 | pcDNA3.1 Neo-           | <i>EcoRI</i> - <i>BamHI</i>   | CD8-DR $\beta$                | F: T7seq, R: TCGGATCCTCATGTTGGCTGCAGTCCAGAGT                                                                                                                                     |
| CD8-DR $\beta$ - $\Delta$ 229 | pcDNA3.1 Neo-           | <i>EcoRI</i> - <i>BamHI</i>   | CD8-DR $\beta$                | F: T7seq, R: AGGAATCAGAAAGGACACTCTGGATGAGGATCCGA                                                                                                                                 |
| CD8-DR $\beta$ - $\Delta$ 227 | pcDNA3.1 Neo-           | <i>EcoRI</i> - <i>BamHI</i>   | CD8-DR $\beta$                | F: T7seq, R: CGGGATCCTCAGTGTCTTTCTGATTCCTGATTC                                                                                                                                   |
| CD8-DR $\beta$ - $\Delta$ 225 | pcDNA3.1 Neo-           | <i>EcoRI</i> - <i>BamHI</i>   | CD8-DR $\beta$                | F: T7seq, R: CGGGATCCTCATTTCTGATTCCTGAAGTAGATG                                                                                                                                   |
| CD8-DR $\beta$ -RNAK          | pcDNA3.1 Neo-           | <i>EcoRI</i> - <i>BamHI</i>   | CD8-DR $\beta$                | F: T7seq, R: CGGGATCCTCATTTAGCATTCTGAAGTAGATGAACAGC                                                                                                                              |
| CD8-DR $\beta$ -RAQK          | pcDNA3.1 Neo-           | <i>EcoRI</i> - <i>BamHI</i>   | CD8-DR $\beta$                | F: T7seq, R: CGGGATCCTCATTTCTGAGCCCTGAAGTAGATGAACAGCC                                                                                                                            |
| CD8-DR $\beta$ -ANQK          | pcDNA3.1 Neo-           | <i>EcoRI</i> - <i>BamHI</i>   | CD8-DR $\beta$                | F: T7seq, R: CGGGATCCTCATTTCTGATTAGCGAAGTAGATGAACAGCCCTG                                                                                                                         |
| CD8-DR $\beta$ -RAAK          | pcDNA3.1 Neo-           | <i>EcoRI</i> - <i>BamHI</i>   | CD8-DR $\beta$                | F: T7seq, R: CGGGATCCTCATTTAGCAGCCCTGAAGTAGATGAACAGCC                                                                                                                            |
| CD8-DR $\beta$ -HF 0          | pcDNA3.1 Zeo+           | <i>EcoRI</i> - <i>XhoI</i>    | CD8-DR $\beta$                | N-term: F: T7seq,<br>R: CAGACCCAGTACAGCGCCCCGACTCCACTCAGTGCCTTGCTCTGTGCAGACCC<br>C-term:<br>F: GCTGTACTGGGTCTGCTCTTCGCTGGGACAGGGCTGTTTCATCGCATTTCAGGAATCAGAAAGG<br>ACAC, R: Zeo2 |
| CD8-DR $\beta$ -HF 1          | pcDNA3.1 Zeo+           | <i>EcoRI</i> - <i>XhoI</i>    | CD8-DR $\beta$                | N-term: F: T7seq, R:<br>CCCCTGTCCCTAGGAAGAGAGCGCCCAGAACAAAACCCCGCTCCACTCAGCATCTTGCTC<br>C-term: F: TCTCTTCCTAGGGACAGGGGCTTTCATCTACTTCAGGAATCAGAA, R: Zeo2                        |
| CD8-DR $\beta$ -HF 2          | pcDNA3.1 Zeo+           | <i>EcoRI</i> - <i>XhoI</i>    | CD8-DR $\beta$                | N-term: F: T7seq,<br>R: GAAGAGCAGGCCAGAGCAAAGCCCCGACTCCACTAGCCATCTTGCTCTGTGCAGAC<br>C-term: F: TCTGGCCCTGCTCTTCCTTGCTACAGGGCTGTTTCATCTACGCTAGGAATCAGAAAGGA<br>CACTCTG, R: Zeo2   |
| CD8-DR $\beta$ -HF 3          | pcDNA3.1 Zeo+           | <i>EcoRI</i> - <i>XhoI</i>    | CD8-DR $\beta$                | N-term: F: T7seq,<br>R: CCCAGTCCCAAGGAAAGCCAGGCCAGCACAAAACCAGCGACTCCACTCAGCATCTTGCT<br>C-term: F: TTTCTTGGGACTGGGCTGGCTATCTACTTCAGGAATCAGAAAGG, R: Zeo2                          |

Supplemental Table 1, continued

|                                      |               |                   |         |                                                                                                                                                             |
|--------------------------------------|---------------|-------------------|---------|-------------------------------------------------------------------------------------------------------------------------------------------------------------|
| CD8-DRβ-HF 4                         | pcDNA3.1 Zeo+ | <i>EcoRI-XhoI</i> | CD8-DRβ | N-term: F: T7seq,<br>R: CAAGGAAGAGCAGGCCAGCCACAAAGCCCCGACTCCAGCCAGCATCTTGCTCTGTGC<br>C-term: F: TGGCCTGCTCTTCCTTGGCGCTGGGCTGTTTCATCTACTTCAG, R: Zeo2        |
| CD8-DRβ-HF 5                         | pcDNA3.1 Zeo+ | <i>EcoRI-XhoI</i> | CD8-DRβ | N-term: F: T7seq,<br>R: ACAGCCCAGTCCCAAGAGCGAGCAGTCCCAGTACAAAAGCCCCGACTCCACTCAGC<br>C-term: F: TCTTGGGACTGGGCTGTTTCGCTTACTTCAGGAATCAGAAAGGACA, R: Zeo2      |
| CD8-DRβ-HF 6                         | pcDNA3.1 Zeo+ | <i>EcoRI-XhoI</i> | CD8-DRβ | N-term: F: T7seq,<br>R: TCCCAAGGAAGAGAAGAGCCAGCACAAAACCCCCGACAGCACTCAGCATCTTGCTCTGTG<br>C-term: F: TCTTCTCTTCCTTGGGACAGCTCTGTTTCATCTACTTCAGGAATCAG, R: Zeo2 |
| CD8-DRβ-<br>M <sup>199-204</sup> G→A | pcDNA3.1 Zeo+ | <i>EcoRI-XhoI</i> | CD8-DRβ | N-term: F: T7seq, R: GCCCAGCACGAAGCCAGCGGCAGCAGCAGCAGCCTTGCTCTGTGCAGACCC<br>C-term: F: GGCTTCGTGCTGGGCGCTGCT, R: Zeo2                                       |
| CD8-DRβ-<br>G <sup>205-210</sup> L→A | pcDNA3.1 Zeo+ | <i>EcoRI-XhoI</i> | CD8-DRβ | N-term: F: T7seq, R: CCTGTCCAAGGAAGAGAGCAGCAGCAGCTGCAGCCCCGACTCCACTCAGC<br>C-term: F: CTCTTCCTTGGGACAGG, R: Zeo2                                            |
| CD8-DRβ-<br>L <sup>211-216</sup> G→A | pcDNA3.1 Zeo+ | <i>EcoRI-XhoI</i> | CD8-DRβ | N-term: F: T7seq,<br>R: CTGATTCCTGAAGTAGATGAACAGAGCTGCTGCTGCTGCTGCCAGGCCAGCACAAAG<br>C-term: F: TCTGTTCATCTACTTCAGGAATCAG, R: Zeo2                          |
| CD8-DRβ-<br>L <sup>217-221</sup> F→A | pcDNA3.1 Zeo+ | <i>EcoRI-XhoI</i> | CD8-DRβ | N-term: F: T7seq,<br>R: CAGAGTGTCTTTCTGATTCCTAGCAGCAGCAGCGGCCCTGTCCCAAGGAAGAGC<br>C-term: F: TAGGAATCAGAAAGGACACTCTG, R: Zeo2                               |
| CD8-DRβ-<br>S <sup>194-AAAAA</sup>   | pcDNA3.1 Zeo+ | <i>EcoRI-XhoI</i> | CD8-DRβ | N-term: F: 5'Prim, R: CCCCTCGTGTGCACTGC<br>C-term: F: CAGTGCACACGAGGGGGGCCGCTGCTGCTATGCTGAGTGGAGTCGGG, R: Zeo2                                              |
| CD8-DRβ-<br>S <sup>194-AAA</sup>     | pcDNA3.1 Zeo+ | <i>EcoRI-XhoI</i> | CD8-DRβ | N-term: F: 5'Prim, R: CCCCTCGTGTGCACTGC<br>C-term: F: CAGTGCACACGAGGGGGGCCGCTGCTAGCAAGATGCTGAGTGGAGTCG, R: Zeo2                                             |
| CD8-DRβ-<br>S <sup>197-AA</sup>      | pcDNA3.1 Zeo+ | <i>EcoRI-XhoI</i> | CD8-DRβ | N-term: F: 5'Prim, R: CCCCTCGTGTGCACTGC<br>C-term: F: CAGTGCACACGAGGGGGTCTGCACAGGCTGCTATGCTGAGTGGAGTC, R: Zeo2                                              |
| CD8-DRβ-<br>S <sup>194-AAAAE</sup>   | pcDNA3.1 Zeo+ | <i>EcoRI-XhoI</i> | CD8-DRβ | N-term: F: 5'Prim, R: CCCCTCGTGTGCACTGC<br>C-term: F: CAGTGCACACGAGGGGGGCCGCTGCTGAGATGCTGAGTGGGA, R: Zeo2                                                   |
| CD8-DRβ-<br>R <sup>222-AAA</sup>     | pcDNA3.1 Zeo+ | <i>EcoRI-XhoI</i> | CD8-DRβ | N-term: F: 5'Prim, R: GAAGTAGATGAACAGCCCTGTC<br>C-term: F: GACAGGGCTGTTTCATCTACTTCGAGCAGCGAAAGGACACTCTG, R: Zeo2                                            |
| CD8-DRβ-<br>R <sup>222-EAA</sup>     | pcDNA3.1 Zeo+ | <i>EcoRI-XhoI</i> | CD8-DRβ | N-term: F: 5'Prim, R: GAAGTAGATGAACAGCCCTGTC<br>C-term: F: GACAGGGCTGTTTCATCTACTTCGAGGCAGCGAAAGGACACTCTG, R: Zeo2                                           |

Supplemental Table 1, continued

|                                           |                 |                      |                                 |                                                                                                                                                                                                                                                                                                                                                                                                                                                                                                                                                                                                                                                                                                                                                                                                                       |
|-------------------------------------------|-----------------|----------------------|---------------------------------|-----------------------------------------------------------------------------------------------------------------------------------------------------------------------------------------------------------------------------------------------------------------------------------------------------------------------------------------------------------------------------------------------------------------------------------------------------------------------------------------------------------------------------------------------------------------------------------------------------------------------------------------------------------------------------------------------------------------------------------------------------------------------------------------------------------------------|
| CD8-DR $\beta$ -K <sup>1</sup>            | pcDNA3.1 Neo-   | <i>EcoRI-BamHI</i>   | CD8-DR $\beta$                  | F: 5'Prim,<br>R: CGGGATCCTCATGCAGCAGCGGCAGCTGCAGCAGCTTTGTAGATGAACAGCCCTGTCCC                                                                                                                                                                                                                                                                                                                                                                                                                                                                                                                                                                                                                                                                                                                                          |
| CD8-DR $\beta$ -K <sup>1</sup>            | pcDNA3.1 Neo-   | <i>EcoRI-BamHI</i>   | CD8-DR $\beta$                  | F: T7seq,<br>R: CGGGATCCTCATGCAGCAGCGGCAGCTTTGAAGTAGATGAACAGCCCTGTC                                                                                                                                                                                                                                                                                                                                                                                                                                                                                                                                                                                                                                                                                                                                                   |
| CD8-DR $\beta$ -K <sup>2</sup>            | pcDNA3.1 Neo-   | <i>EcoRI-BamHI</i>   | CD8-DR $\beta$                  | F: 5'Prim, R: CGGGATCCTCATGCAGCAGCGGCAGCTGCAGCTTTAGCGAAGTAGATGAACAGCCC                                                                                                                                                                                                                                                                                                                                                                                                                                                                                                                                                                                                                                                                                                                                                |
| CD8-DR $\beta$ -K <sup>3</sup>            | pcDNA3.1 Neo-   | <i>EcoRI-BamHI</i>   | CD8-DR $\beta$                  | F: 5'Prim, R: CGGGATCCTCATGCAGCGGCTTTAGCTGCAGCAGCGAAGTAGATGAACAG                                                                                                                                                                                                                                                                                                                                                                                                                                                                                                                                                                                                                                                                                                                                                      |
| CD8-DR $\beta$ -K <sup>4</sup>            | pcDNA3.1 Neo-   | <i>EcoRI-BamHI</i>   | CD8-DR $\beta$                  | N-term: F: T7seq, R: TCATGCAGCGGCAGCTTTTGCAGCAGCGAAGTAGATGAACAGCCCTGTC<br>C-term: F: AGCTGCCGCTGCATGAGGATCCGAGCTCG, R : GATGCAATTTCTCATTATTATTAG                                                                                                                                                                                                                                                                                                                                                                                                                                                                                                                                                                                                                                                                      |
| CD8-DR $\beta$ -K <sup>5</sup>            | pcDNA3.1 Neo-   | <i>EcoRI-BamHI</i>   | CD8-DR $\beta$                  | F: 5'Prim, R: CGGGATCCTCATGCAGCAGCGGCAGCTTTAGCAGCGAAGTAGATGAACAG                                                                                                                                                                                                                                                                                                                                                                                                                                                                                                                                                                                                                                                                                                                                                      |
| CD8-DR $\beta$ -K <sup>6</sup>            | pcDNA3.1 Neo-   | <i>EcoRI-BamHI</i>   | CD8-DR $\beta$ -K <sup>5</sup>  | F: 5'Prim, R: CGGGATCCTCATGCAGCTTTGGCAGCTGCAGCAGCGA                                                                                                                                                                                                                                                                                                                                                                                                                                                                                                                                                                                                                                                                                                                                                                   |
| CD8-DR $\beta$ -K <sup>7</sup>            | pcDNA3.1 Neo-   | <i>EcoRI-BamHI</i>   | CD8-DR $\beta$                  | F: T7seq,<br>R: CGGGATCCTCATGCTTTAGCGGCAGCAGCGGCAGCGAAGTAGATGAACAGCCCTGTC                                                                                                                                                                                                                                                                                                                                                                                                                                                                                                                                                                                                                                                                                                                                             |
| HLA-DR $\alpha$ -KK <sup>215,219</sup> RR | pcDNA3.1 Zeo+   | <i>HindIII-BamHI</i> | HLA-DR $\alpha$                 | F: 5'Prim,<br>R: AATGGATCCTTACAGAGGCCCCCTGCGTTCTGCTGCATTGCTTCTGCGCACTCCCCTGATGATG                                                                                                                                                                                                                                                                                                                                                                                                                                                                                                                                                                                                                                                                                                                                     |
| HLA-DR $\beta$                            | pcDNA3.1 Hygro+ | <i>HindIII-BamHI</i> | cDNA , DRB1*0303                | F: CCCCAAGCTTGGCCACCATGGTGTGTCTGAGGCTCCCTG<br>R: AAGGATCCTAGCTCAGGAATCCTCTTGGCTG                                                                                                                                                                                                                                                                                                                                                                                                                                                                                                                                                                                                                                                                                                                                      |
| HLA-DR $\beta$ -wt                        | pcDNA3.1 Hygro+ | <i>HindIII-BamHI</i> | CD8-DR $\beta$ , HLA-DR $\beta$ | N-term: F: 5'Prim, R: CTGTGCAGATTCAATCGATGCTCTCCATTCCACTG<br>C-term: F: GAGCATCGATTGAATCTGCACAGAGCAAGATGCT ,<br>R: TATGGATCCTCAGCTCAAGAGTCTGTTGGC<br>This construct was a chimera between the DR3 $\beta$ extracellular domain and the perimembrane-transmembrane-cytoplasmic tail region of DR1 $\beta$ (which was also used in the CD8-DR $\beta$ reporters). A unique <u>Clal</u> site (underlined in primers) was introduced in the non-folded amino acid chain between the folded part of the Ig domain and the juxtamembrane region. This resulted in minimal amino acid substitutions ( <sup>191</sup> RS <sup>192</sup> SI) in that region and did not affect DR folding or antigen loading (the modified DR was bound by mAb 16.23 which only binds correctly folded, SDS-stable DR3 dimers; data not shown) |

Supplemental Table 1, continued

|                                |                                |                     |                        |                                                                                                                                                                                                                                                                                                                                                                                                                                                                                                      |
|--------------------------------|--------------------------------|---------------------|------------------------|------------------------------------------------------------------------------------------------------------------------------------------------------------------------------------------------------------------------------------------------------------------------------------------------------------------------------------------------------------------------------------------------------------------------------------------------------------------------------------------------------|
| HLA-DRβ-K <sup>1</sup>         | pcDNA3.1 Hygro+ HLA-DR3-DRβ-wt | <i>HindIII-XhoI</i> | CD8-DRβ-K <sup>1</sup> | F: GAGCATCGATTGAATCTGCACAGAGCAAGATGCT,<br>R: TATCTCGAGTGTA <sup>AAACGACGGCCAGT</sup> GATCAGCGGTTTAAACTTAAGC<br>Pair of universal primers that bound at the DRβ perimembrane region (F) and 3' terminal of the multiple cloning site on pcDNA3.1 Hygro+ (R). Insert was digested with <i>Clal</i> and <i>XhoI</i> (underlined) and inserted between the same sites in HLA-DR3-DRβ-wt. The reverse primer also contained a <i>M13F priming site</i> for screening for inserts by colony PCR (italics). |
| HLA-DRβ-K <sup>1</sup>         | pcDNA3.1 Hygro+ HLA-DR3-DRβ-wt | <i>Clal-XhoI</i>    | CD8-DRβ-K <sup>1</sup> | F: GAGCATCGATTGAATCTGCACAGAGCAAGATGCT,<br>R: TATCTCGAGTGTA <sup>AAACGACGGCCAGT</sup> GATCAGCGGTTTAAACTTAAGC                                                                                                                                                                                                                                                                                                                                                                                          |
| HLA-DRβ-K <sup>2</sup>         | pcDNA3.1 Hygro+ HLA-DR3-DRβ-wt | <i>Clal-XhoI</i>    | CD8-DRβ-K <sup>2</sup> | F: GAGCATCGATTGAATCTGCACAGAGCAAGATGCT,<br>R: TATCTCGAGTGTA <sup>AAACGACGGCCAGT</sup> GATCAGCGGTTTAAACTTAAGC                                                                                                                                                                                                                                                                                                                                                                                          |
| HLA-DRβ-K <sup>3</sup>         | HLA-DR3-DRβ-wt                 | <i>Clal-XhoI</i>    | CD8-DRβ-K <sup>3</sup> | F: GAGCATCGATTGAATCTGCACAGAGCAAGATGCT,<br>R: TATCTCGAGTGTA <sup>AAACGACGGCCAGT</sup> GATCAGCGGTTTAAACTTAAGC                                                                                                                                                                                                                                                                                                                                                                                          |
| HLA-DRβ-K <sup>4</sup>         | pcDNA3.1 Hygro+ HLA-DR3-DRβ-wt | <i>Clal-XhoI</i>    | CD8-DRβ-K <sup>4</sup> | F: GAGCATCGATTGAATCTGCACAGAGCAAGATGCT,<br>R: TATCTCGAGTGTA <sup>AAACGACGGCCAGT</sup> GATCAGCGGTTTAAACTTAAGC                                                                                                                                                                                                                                                                                                                                                                                          |
| HLA-DRβ-K <sup>5</sup>         | pcDNA3.1 Hygro+ HLA-DR3-DRβ-wt | <i>Clal-XhoI</i>    | CD8-DRβ-K <sup>5</sup> | F: GAGCATCGATTGAATCTGCACAGAGCAAGATGCT,<br>R: TATCTCGAGTGTA <sup>AAACGACGGCCAGT</sup> GATCAGCGGTTTAAACTTAAGC                                                                                                                                                                                                                                                                                                                                                                                          |
| HLA-DRβ-K <sup>6</sup>         | pcDNA3.1 Hygro+ HLA-DR3-DRβ-wt | <i>Clal-XhoI</i>    | CD8-DRβ-K <sup>6</sup> | F: GAGCATCGATTGAATCTGCACAGAGCAAGATGCT,<br>R: TATCTCGAGTGTA <sup>AAACGACGGCCAGT</sup> GATCAGCGGTTTAAACTTAAGC                                                                                                                                                                                                                                                                                                                                                                                          |
| HLA-DRβ-K <sup>7</sup>         | HLA-DR3-DRβ-wt                 | <i>Clal-XhoI</i>    | CD8-DRβ-K <sup>7</sup> | F: GAGCATCGATTGAATCTGCACAGAGCAAGATGCT,<br>R: TATCTCGAGTGTA <sup>AAACGACGGCCAGT</sup> GATCAGCGGTTTAAACTTAAGC                                                                                                                                                                                                                                                                                                                                                                                          |
| HLA-DQβ                        | pCR2.1-TOPO                    | -                   | cDNA, HeLa.CIITA       | F: ATAAGCTTCGCCACCATGCTCTTGAAGAAGGCTTTG,<br>R: TACTCGAGTCTCAGGAGTCA <sup>GTGCAGAAG</sup><br>universal primer pair for DQB1, with <i>HindIII</i> and <i>XhoI</i> sites, <u>START</u> and <u>STOP</u> codons underlined                                                                                                                                                                                                                                                                                |
| HLA-DRβ-DQβ <sup>215-229</sup> | pcDNA3.1 Zeo+                  | <i>HindIII-XhoI</i> | HLA-DRβ-wt, HLA-DQβ    | C-term: F: 5'Prim, R: CCAAGCCCAAGGAAGAGCAGGCCCA<br>N-term: F: TGCTCTTCCTTGGGCTTGGCCTTATCATCCGTCAA,<br>R: TACTCGAGTCTCAGGAGTCA <sup>GTGCAGAAG</sup>                                                                                                                                                                                                                                                                                                                                                   |

Supplemental Table 1, continued

|                                |                 |                      |                                             |                                                                                                                                                                                                                         |
|--------------------------------|-----------------|----------------------|---------------------------------------------|-------------------------------------------------------------------------------------------------------------------------------------------------------------------------------------------------------------------------|
| HLA-DRβ <sup>-DQβ215-221</sup> | pcDNA3.1 Hygro+ | <i>HindIII-BamHI</i> | HLA-DRβ <sup>-DQβ215-229</sup> , HLA-DRβ-wt | N-term.: F: 5'Prim, R: TCCTTTCTGATTCCTTTGACGGATGATAAGGCC<br>C-term: F: CATCCGTCAAAGGAATCAGAAAGGACACTCTGG, R: Zeo2                                                                                                       |
| EGFP-MARCH8                    | pEGFP C2        | <i>EcoRI-KpnI</i>    | pTracer/MARCH8                              | F: GCTTGGTACTAATACGACTCACTATAGGGA, R: <u>AGCGGTACCTAATGGTGATGGTGATGATG</u> MARCH8wt cloned from pTracer construct together with V5 and HIS tags, cut with <i>EcoRI</i> (on plasmid) and <u><i>KpnI</i></u> (underlined) |
| EGFP-MARCH8mut                 | pEGFP C2        | <i>EcoRI-KpnI</i>    | pTracer/MARCH8 mut                          | F: GCTTGGTACTAATACGACTCACTATAGGGA, R: <u>AGCGGTACCTAATGGTGATGGTGATGATG</u>                                                                                                                                              |

Further primer sequences:

T7seq: TAATACGACTCACTATAGGG  
5'Prim: ACCCACTGCTTACTGGCTTATCG  
Zeo2: CATGCCTGCTATTGTCTCCC

Supplemental Table 1.

List of primers used in the generation of constructs used in this study.
